# Supplementary material for: Molecular details of ruthenium red pore block in TRPV channels
Source: Springer Nature journal article supplement (doi:10.1038/s44319-023-00050-0), 2024-01-15
Supplement: MOESM1 [file 44319_2023_50_MOESM1_ESM.pdf]

# Appendix

## Table of contents

|                                                                                                            |           |
|------------------------------------------------------------------------------------------------------------|-----------|
| <b>Appendix Table S1.</b> Cryo-EM data collection and model statistics                                     | <b>2</b>  |
| <b>Appendix Figure S1.</b> TRPV2 cryoEM data quality.                                                      | <b>3</b>  |
| <b>Appendix Figure S2.</b> TRPV2 cryoEM processing trees.                                                  | <b>4</b>  |
| <b>Appendix Figure S3.</b> TRPV2 <sub>2APB+RR</sub> and TRPV2 <sub>RR</sub> vanilloid pocket densities.    | <b>5</b>  |
| <b>Appendix Figure S4.</b> Half map density of TRPV2 <sub>2APB+RR</sub> and TRPV2 <sub>RR</sub> .          | <b>6</b>  |
| <b>Appendix Figure S5.</b> TRPV5 cryoEM data quality.                                                      | <b>7</b>  |
| <b>Appendix Figure S6.</b> TRPV5 with RR cryoEM processing trees.                                          | <b>8</b>  |
| <b>Appendix Figure S7.</b> TRPV5 cryoEM selectivity filter density without symmetry.                       | <b>9</b>  |
| <b>Appendix Figure S8.</b> Half map density of TRPV5 <sub>RR</sub> and TRPV5 <sub>PIP2+RR</sub> .          | <b>10</b> |
| <b>Appendix Figure S9.</b> TRPV5 cryoEM PI(4,5)P <sub>2</sub> binding site and vanilloid pocket densities. | <b>11</b> |
| <b>Appendix Figure S10.</b> RR block comparison between TRPV5 and TRPV6.                                   | <b>12</b> |

**Appendix Table S1. Cryo-EM data collection and model statistics**

|                                                     | TRPV2 <sup>RR</sup><br>(EMD-29046,<br>PDB 8FFL) | TRPV2 <sup>2APB+RR</sup><br>(EMD-29047,<br>PDB 8FFM) | TRPV5 <sup>RR</sup><br>(EMD-29048,<br>PDB 8FFN) | TRPV5 <sup>PIP2+RR</sup><br>(EMD-29051,<br>PDB 8FFQ) |
|-----------------------------------------------------|-------------------------------------------------|------------------------------------------------------|-------------------------------------------------|------------------------------------------------------|
| <b>Data collection and processing</b>               |                                                 |                                                      |                                                 |                                                      |
| Magnification                                       | 81,000x                                         | 105,000x                                             | 105,000x                                        | 105,000x                                             |
| Voltage (kV)                                        | 300                                             | 300                                                  | 300                                             | 300                                                  |
| Camera                                              | K3                                              | K3                                                   | K3                                              | K3                                                   |
| Electron exposure (e <sup>-</sup> /Å <sup>2</sup> ) |                                                 |                                                      | 43                                              | 42.9                                                 |
| Defocus range (μm)                                  | -0.5 to -2.0                                    | -0.5 to -2.0                                         | -0.5 to -2.0                                    | -0.8 to -2.5                                         |
| Pixel size (Å)                                      | 1.07                                            | 0.834                                                | 0.84                                            | 0.83                                                 |
| Micrographs                                         | 12,659                                          | 10,643                                               | 9,175                                           | 12,412                                               |
| Particles from 2D classification                    | 433,561                                         | 516,889                                              | 130,744                                         | 6,859,887                                            |
| Final particles                                     | 55,445                                          | 65,741                                               | 39,976                                          | 368,030                                              |
| Symmetry                                            | C1                                              | C4                                                   | C4                                              | C4                                                   |
| Map resolution (Å)                                  | 3.47                                            | 2.9                                                  | 2.96                                            | 2.65                                                 |
| FSC threshold                                       | 0.143                                           | 0.143                                                | 0.143                                           | 0.143                                                |
| <b>Model Refinement</b>                             |                                                 |                                                      |                                                 |                                                      |
| Model composition                                   |                                                 |                                                      |                                                 |                                                      |
| Nonhydrogen atoms                                   | 19,675                                          | 20,067                                               | 19,871                                          | 19,679                                               |
| Protein residues                                    | 2,426                                           | 2,492                                                | 2,408                                           | 2,408                                                |
| Ligands                                             | 4                                               | 9                                                    | 17                                              | 13                                                   |
| <i>B</i> factors (Å <sup>2</sup> )                  |                                                 |                                                      |                                                 |                                                      |
| Protein                                             | 45.6                                            | 60.19                                                | 43.46                                           | 43.46                                                |
| Ligand                                              | 32.33                                           | 80.01                                                | 42.10                                           | 35.39                                                |
| R.M.S. deviations                                   |                                                 |                                                      |                                                 |                                                      |
| Bond lengths (Å)                                    | 0.002                                           | 0.011                                                | 0.025                                           | 0.028                                                |
| Bond angles (°)                                     | 0.488                                           | 1.873                                                | 2.080                                           | 2.466                                                |
| Validation                                          |                                                 |                                                      |                                                 |                                                      |
| MolProbity score                                    | 1.18                                            | 1.14                                                 | 1.32                                            | 1.09                                                 |
| Clashscore                                          | 3.88                                            | 2.07                                                 | 5.19                                            | 2.98                                                 |
| Rotamer outliers (%)                                | 0.29                                            | 0.38                                                 | 0.58                                            | 0.00                                                 |
| Ramachandran plot                                   |                                                 |                                                      |                                                 |                                                      |
| Favored (%)                                         | 98.94                                           | 97.05                                                | 97.82                                           | 98.49                                                |
| Allowed (%)                                         | 1.06                                            | 2.95                                                 | 2.18                                            | 1.51                                                 |
| Disallowed (%)                                      | 0.00                                            | 0.00                                                 | 0.00                                            | 0.00                                                 |

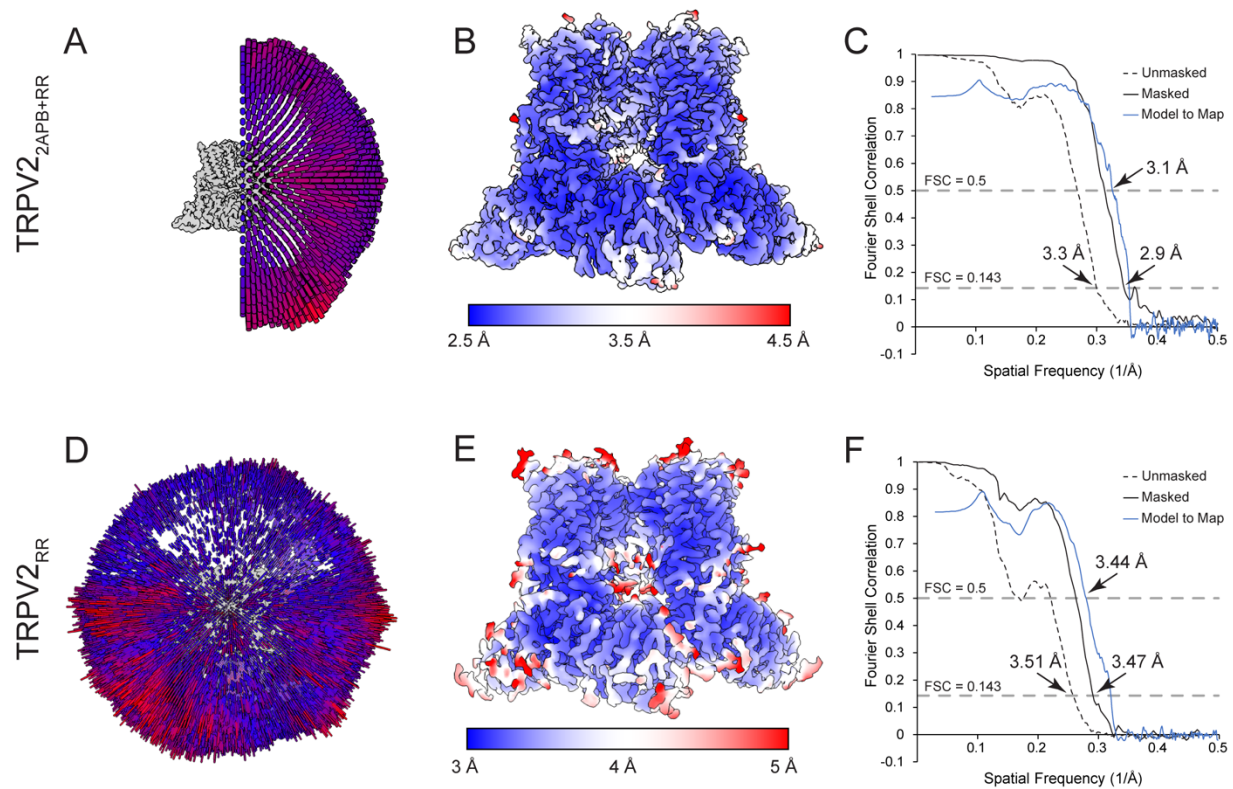

### Appendix Figure S1. TRPV2 cryoEM data quality.

**A** Angular distribution of TRPV2<sub>2APB+RR</sub>.

**B** Local resolution calculated using BlocRes of TRPV2<sub>2APB+RR</sub>.

**C** The unmasked (dashed line), masked (black line), and model to map (blue line) FSCs curves of TRPV2<sub>2APB+RR</sub>.

**D** Angular distribution of TRPV2<sub>RR</sub>.

**E** Local resolution calculated using BlocRes of TRPV2<sub>RR</sub>.

**F** The unmasked (dashed line), masked (black line), and model to map (blue line) FSCs curves of TRPV2<sub>RR</sub>.

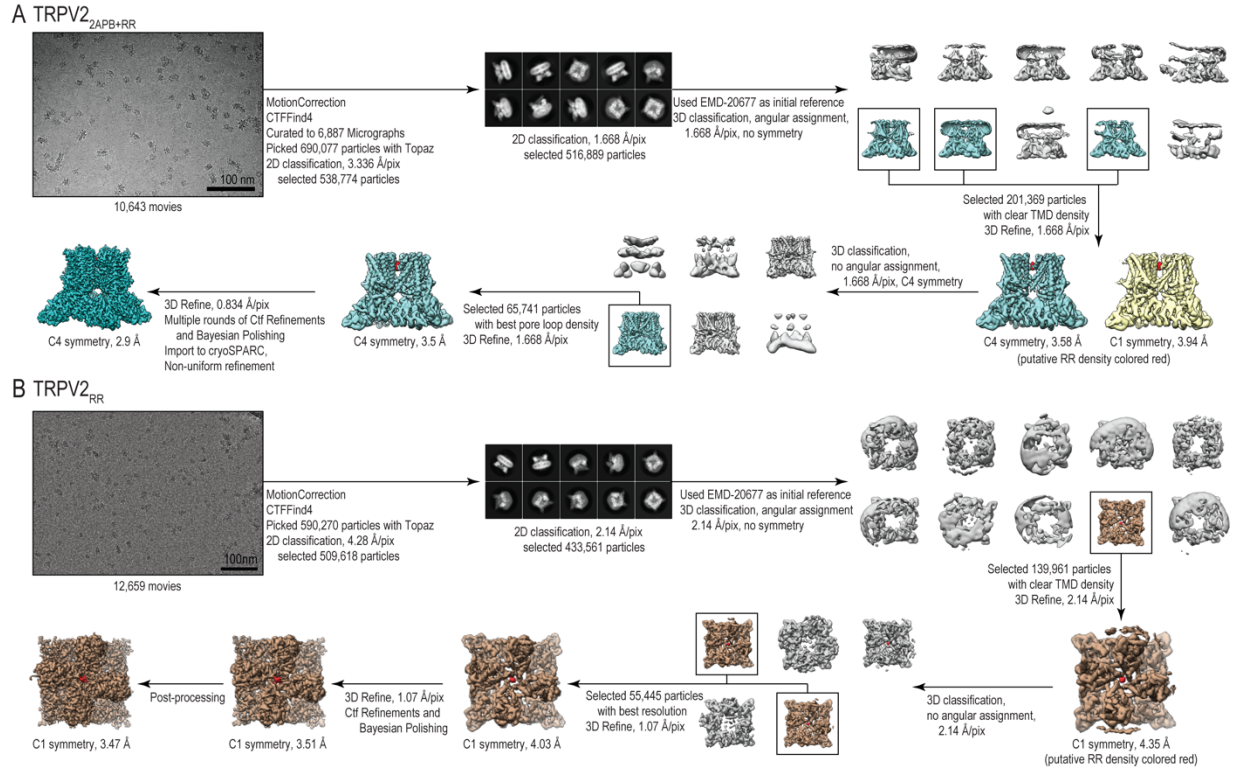

**Appendix Figure S2. TRPV2 cryoEM processing trees.**

**A,B** Processing trees for TRPV2<sub>2APB+RR</sub> (**A**) and TRPV2<sub>RR</sub> (**B**).



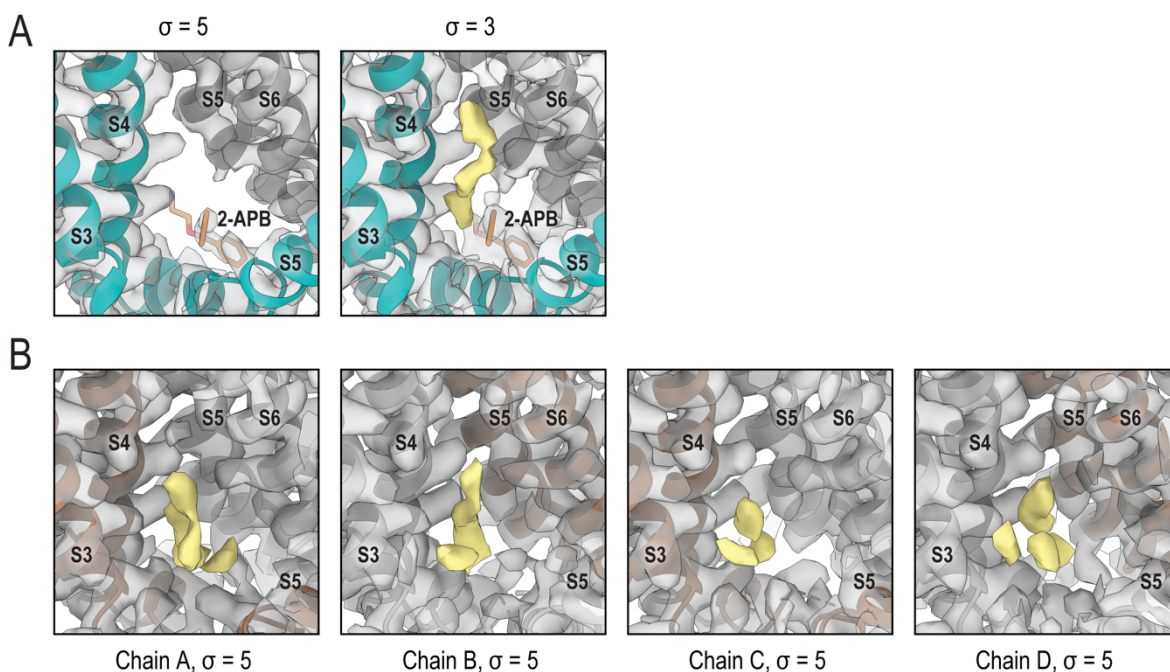

**Appendix Figure S3. TRPV2<sub>2APB+RR</sub> and TRPV2<sub>RR</sub> vanilloid pocket densities.**

**A** Map density and cartoon representation of the TRPV2<sub>2APB+RR</sub> vanilloid pocket. One monomer is colored teal, the adjacent monomers are colored grey. Putative lipid density is colored khaki, 2-APB is colored orange. The map is contoured at  $\sigma = 5$  (left) or  $\sigma = 3$  (right).

**B** Map density and cartoon representation of each TRPV2<sub>RR</sub> vanilloid pocket. Chains A and C are colored brown, Chains B and D are colored grey. The map is contoured at  $\sigma = 5$ . Putative lipid density is colored khaki.

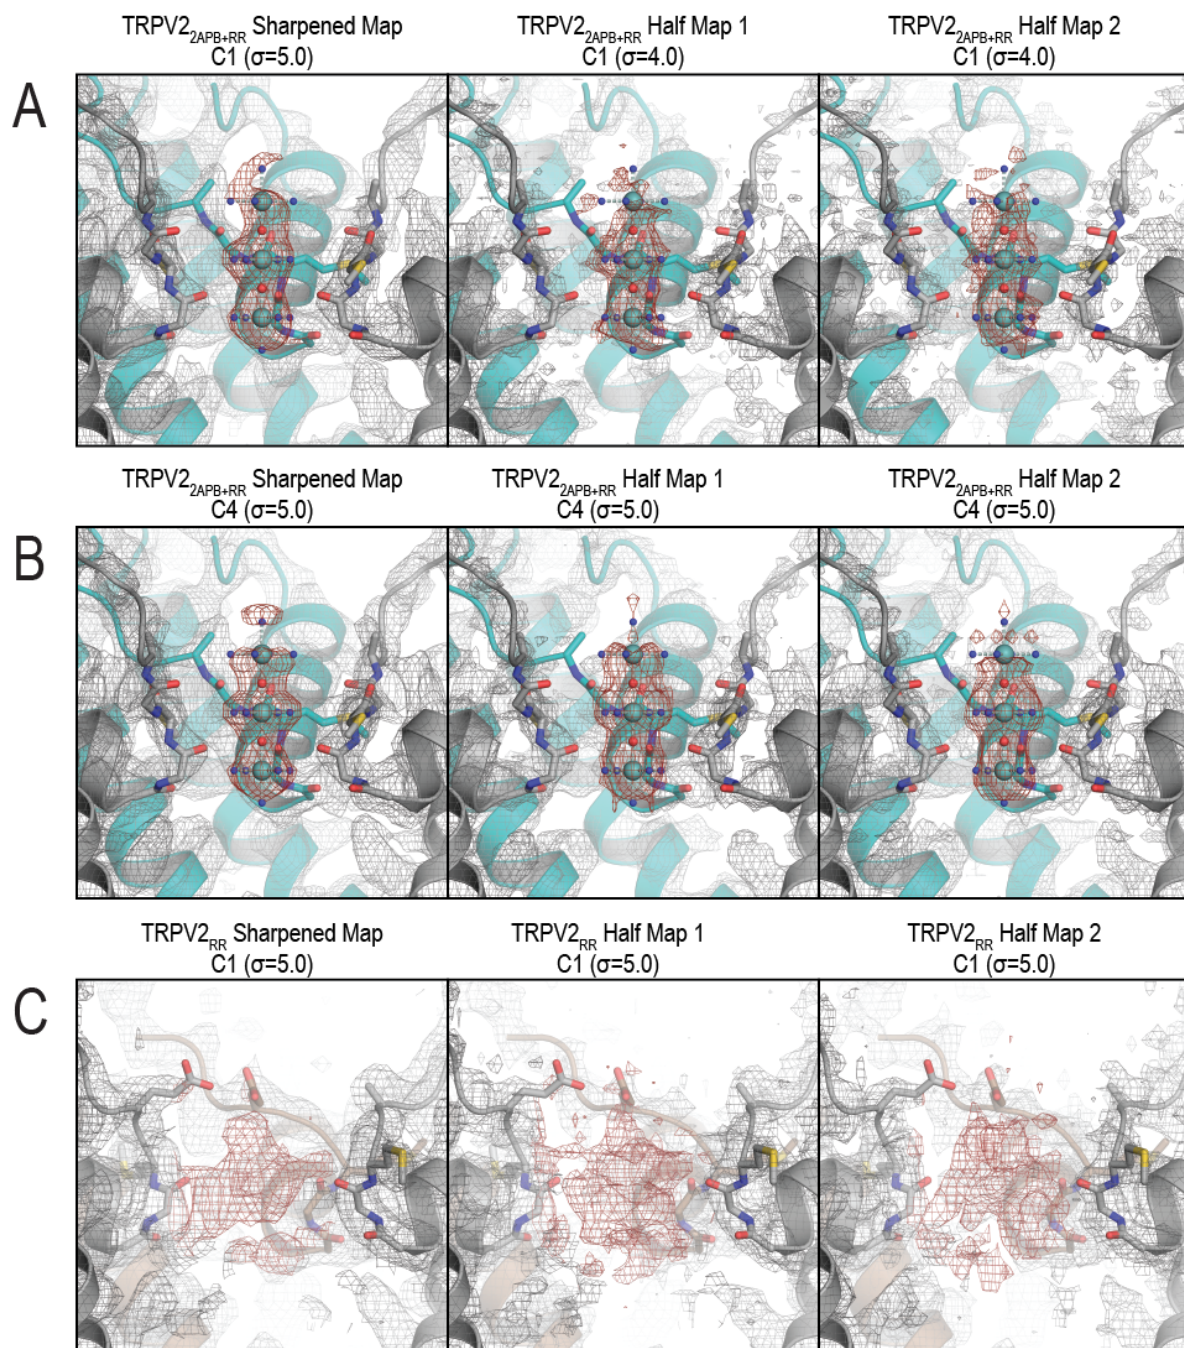

**Appendix Figure S4. Half map density of TRPV2<sub>2APB+RR</sub> and TRPV2<sub>RR</sub>.**

**A-C** Main map and half map density for TRPV2<sub>2APB+RR</sub> refined without symmetry (**A**), TRPV2<sub>2APB+RR</sub> refined with C4 symmetry (**B**), and TRPV2<sub>RR</sub> refined without symmetry (**C**). Density for RR is red.

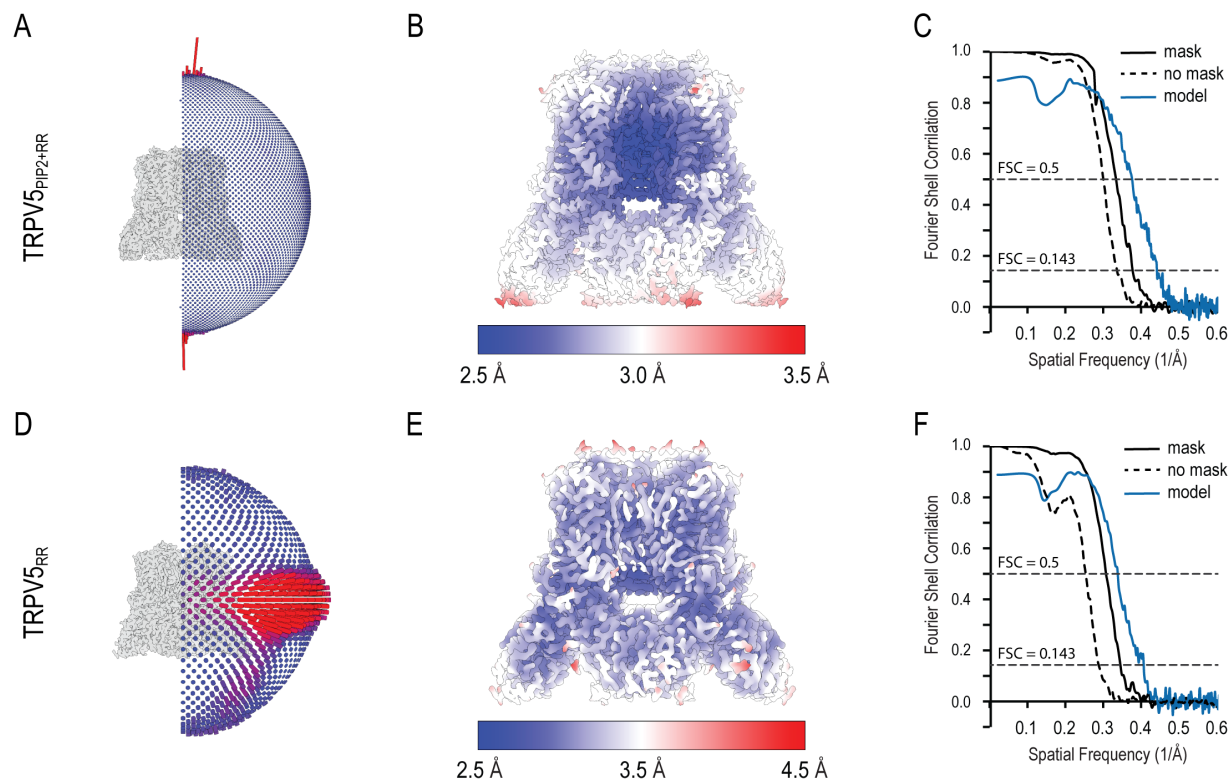

### Appendix Figure S5. TRPV5 cryoEM data quality.

**A** Angular distribution of TRPV5<sub>PIP2+RR</sub>.

**B** Local resolution calculated using BlocRes of TRPV5<sub>PIP2+RR</sub>.

**C** The unmasked (dashed line), masked (black line), and model to map (blue line) FSCs curves of TRPV5<sub>PIP2+RR</sub>.

**D** Angular distribution of TRPV5<sub>RR</sub>.

**E** Local resolution calculated using BlocRes of TRPV5<sub>RR</sub>.

**F** The unmasked (dashed line), masked (black line), and model to map (blue line) FSCs curves of TRPV5<sub>RR</sub>.



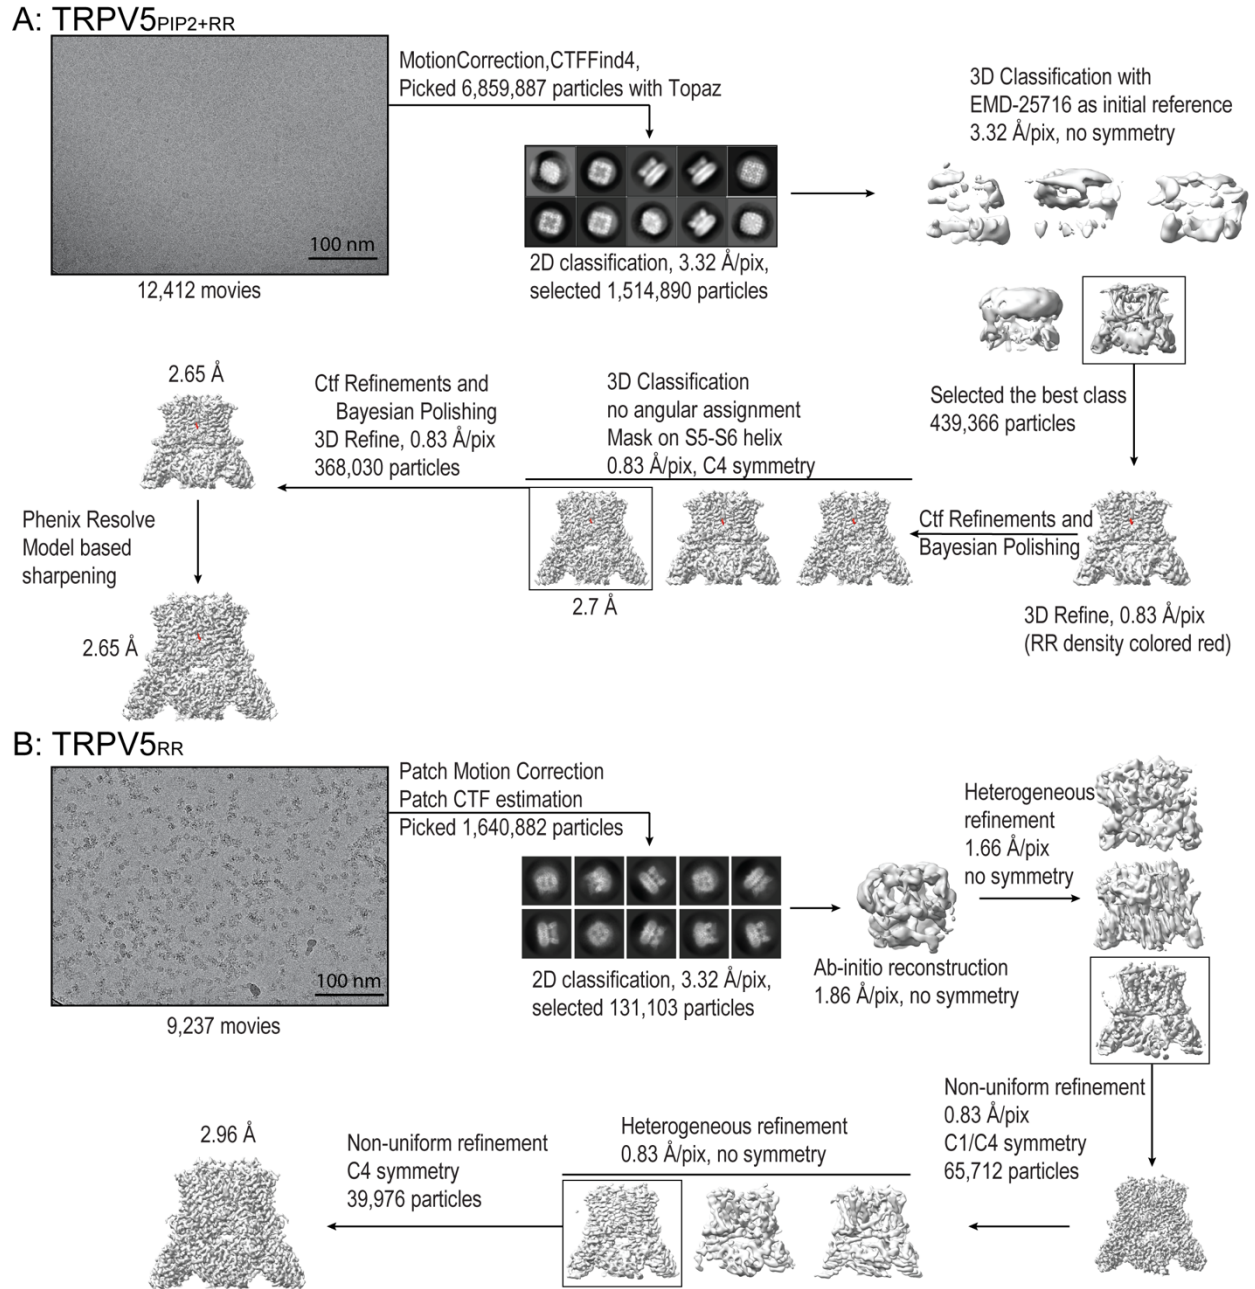

**Appendix Figure S6. TRPV5 with RR cryoEM processing trees.**

**A,B** Processing trees for TRPV5<sub>PIP2+RR</sub> (**A**) and TRPV5<sub>RR</sub> (**B**).

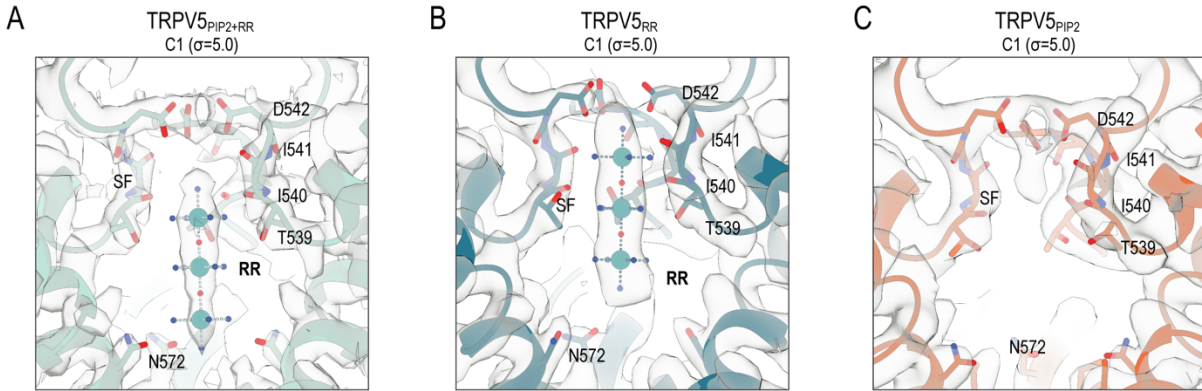

**Appendix Figure S7. TRPV5 cryoEM selectivity filter density without symmetry.**

**A-C** Map density at the Selectivity Filter for TRPV5<sub>PIP2+RR</sub> (**A**), TRPV5<sub>RR</sub> (**B**), and TRPV5<sub>PIP2</sub> (EMD-29049, PDB 8FFO) (**C**) refined without symmetry. Maps contoured at  $\sigma = 5$ .

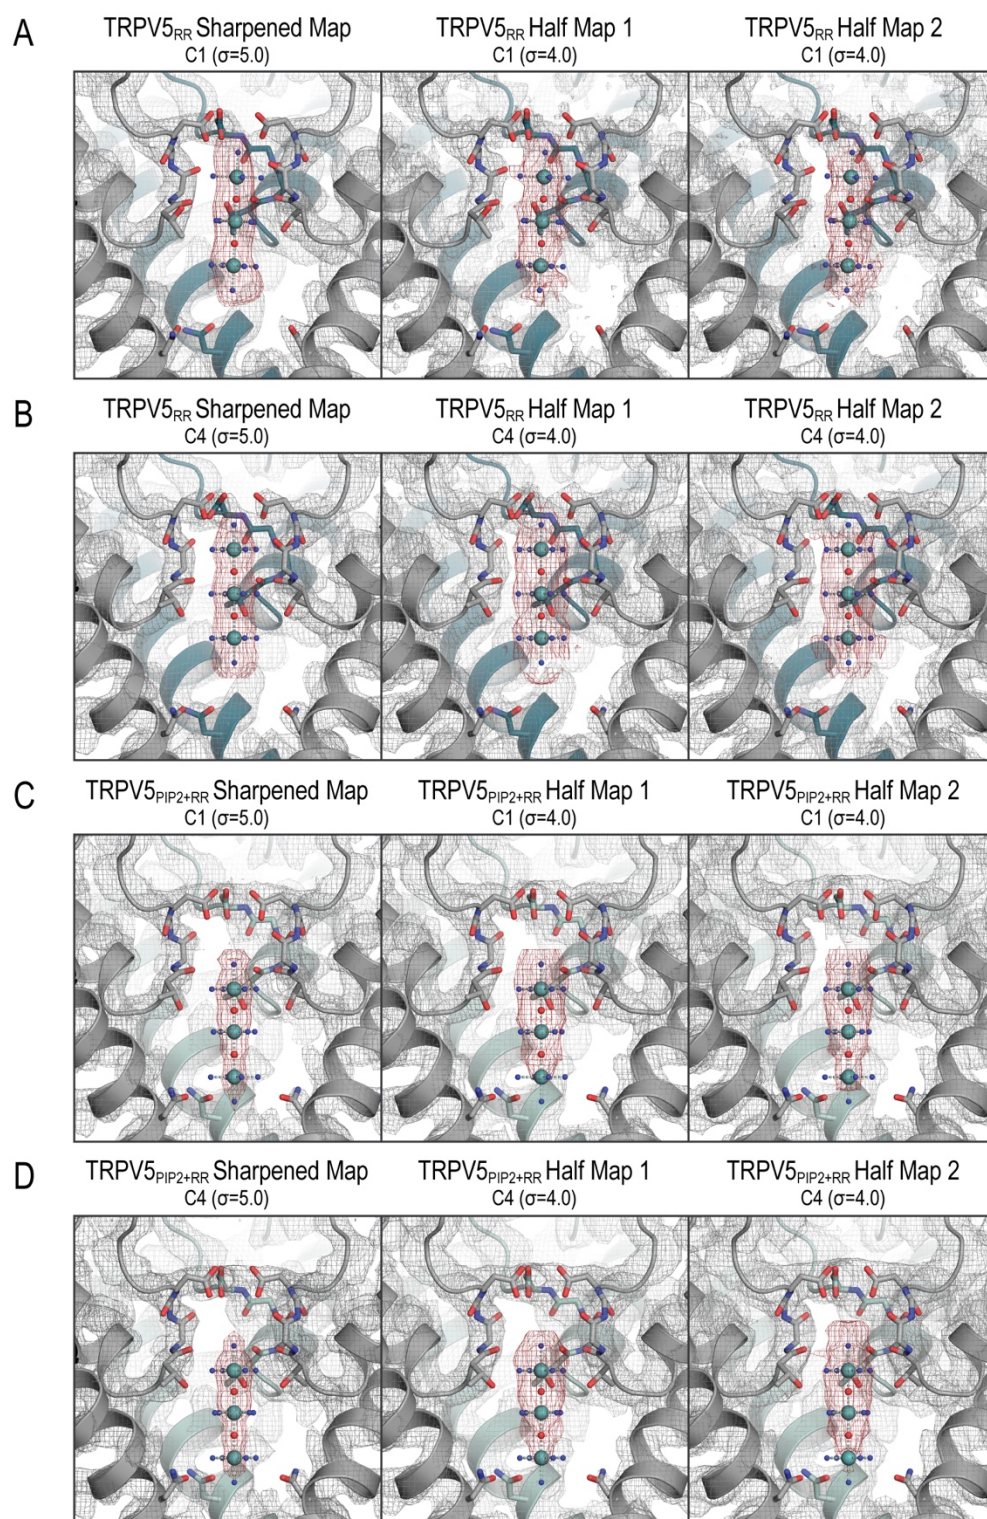

**Appendix Figure S8. Half map density of TRPV5<sub>RR</sub> and TRPV5<sub>PIP2+RR</sub>.**

**A-D** Main map and half map density for TRPV5<sub>RR</sub> refined without symmetry (**A**), TRPV5<sub>RR</sub> refined with C4 symmetry (**B**), TRPV5<sub>PIP2+RR</sub> refined without symmetry (**C**), and TRPV5<sub>PIP2+RR</sub> refined with C4 symmetry (**D**). Density for RR is red.



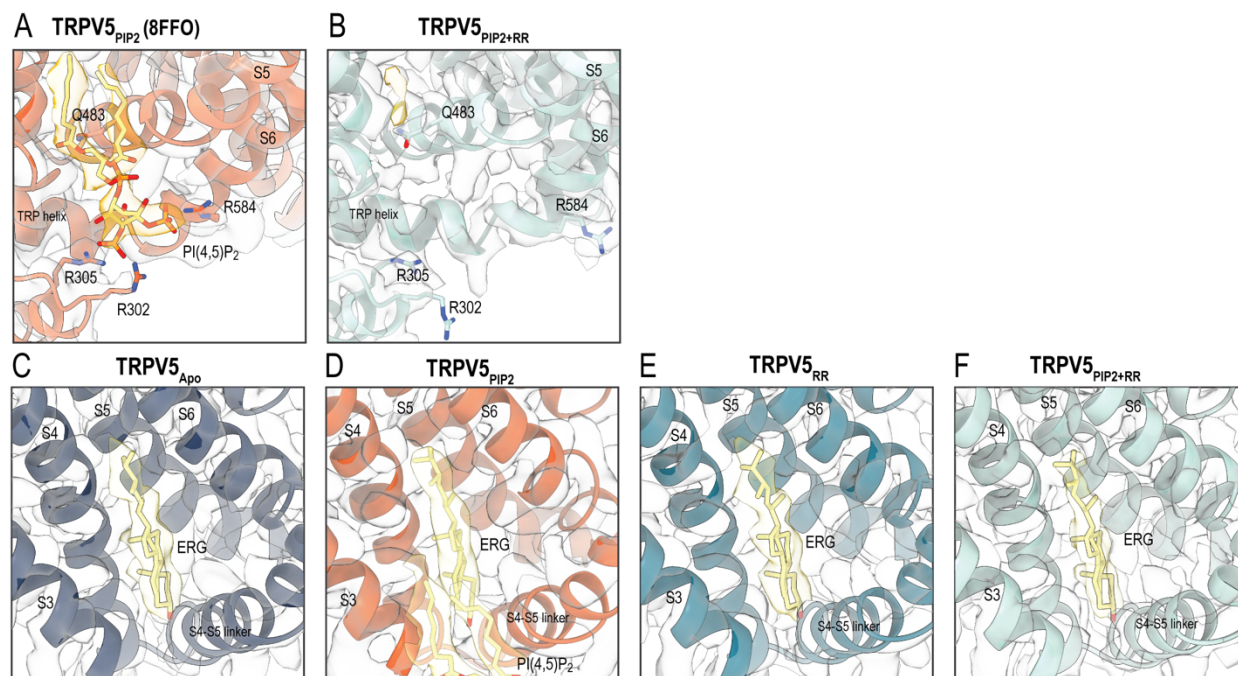

**Appendix Figure S9. TRPV5 cryoEM PI(4,5)P<sub>2</sub> binding site and vanilloid pocket densities.**  
**A,B** Map density at the PI(4,5)P<sub>2</sub> binding site for TRPV5<sub>PIP2</sub> (EMD-29049, PDB 8FFO) (**A**) and TRPV5<sub>PIP2+RR</sub> (**B**).  
**C-F** Ergosterol density at the vanilloid pocket for TRPV5<sub>Apo</sub> (**C**), TRPV5<sub>PIP2</sub> (**D**), TRPV5<sub>RR</sub> (**E**), and TRPV5<sub>PIP2+RR</sub> (**F**). Maps contoured at  $\sigma = 3.0$ .

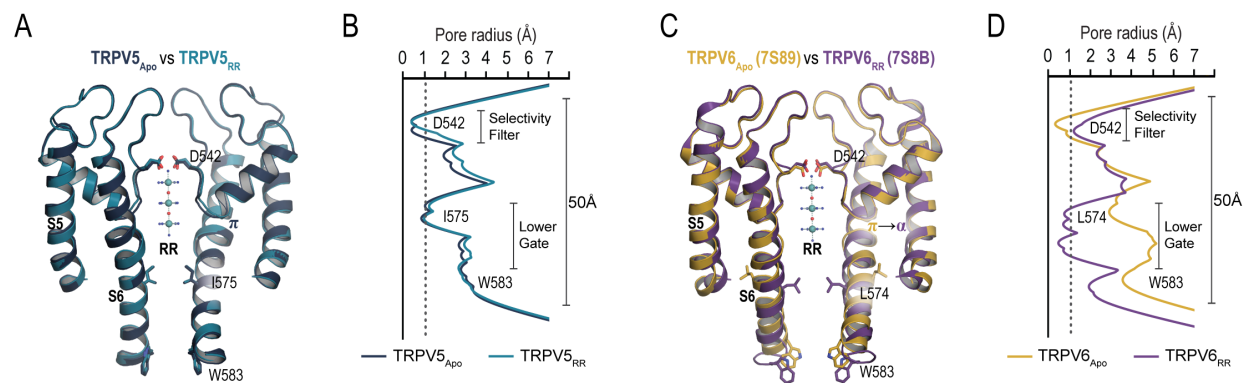

### Appendix Figure S10. RR block comparison between TRPV5 and TRPV6.

**A** HOLE-generated pore profile of Apo and RR blocked TRPV5.

**B** Graphical representation of the pore profiles of TRPV5<sub>Apo</sub> (dark blue) and TRPV5<sub>RR</sub> (medium blue).

**C** HOLE-generated pore profile of Apo and RR blocked TRPV6.

**D** Graphical representation of the pore profiles of TRPV6<sub>Apo</sub> (gold) and TRPV6<sub>RR</sub> (purple). The radius of a dehydrated calcium ion is marked by a dotted gray line at 1.1 Å.
